# Supplementary material for: Production of biallelic CMP-Neu5Ac hydroxylase knock-out pigs
Source: PubMed Central journal article supplement — Sci Rep. 2013 Jun 13;3:1981. doi: 10.1038/srep01981 (PMC4070623; doi:10.1038/srep01981), 2013-06-13

## *Supplementary data*

### **Production of biallelic CMP-Neu5Ac hydroxylase knock-out pigs**

Deug-Nam Kwon\*<sup>1</sup>, Kiho Lee\*<sup>2</sup>, Man-Jong Kang\*<sup>3</sup>, Yun-Jung Choi<sup>1</sup>, Chankyu Park<sup>1</sup>, Jeffrey J Whyte<sup>2</sup>, Alana N Brown<sup>2</sup>, Jae-Hwan Kim<sup>4</sup>, Melissa Samuel<sup>2</sup>, Jiude Mao<sup>2</sup>, Kwang-Wook Park<sup>2,5</sup>, Clifton N Murphy<sup>2</sup>, Randall S. Prather<sup>2†</sup>, and Jin-Hoi Kim<sup>1†</sup>

<sup>1</sup>Department of Animal Biotechnology, Konkuk University, Seoul 143-701, Republic of Korea

<sup>2</sup>Division of Animal Science, University of Missouri-Columbia, Columbia, Missouri

<sup>3</sup>Department of Animal Science, Chonnam National University, Gwangju 500-757, Republic of Korea

<sup>4</sup>CHA Stem Cell Institute, Graduate School of Life Science and Biotechnology, Pochon CHA University, Seoul 135-907, Republic of Korea

<sup>5</sup>Department of Animal Science and Technology, Suncheon National University, Suncheon, Jeonnam 540-742, Republic of Korea

**Supplementary data include 5 tables and 2 figures**

**Supplementary table 1. Primer sets used to construct donor DNA with a minimum homology length in the ZFN mediated gene targeting**

| Donor      |       | Forward primer                  | Reverse primer                 | PCR product |
|------------|-------|---------------------------------|--------------------------------|-------------|
| 780 bp     | Left  | GCgcgccgcCCACTCTCTATTTGGTGGCT   | GCgaattc GGAGTTTCTCCTTTCTG     | 789 bp      |
|            | Right | CGaagcttCCTACAACCCAGAATTTACTGC  | CGctcgagAACAGGGACCTGCCAAGAGGCC | 763 bp      |
| 240 bp     | Left  | GCgcgccgcGTCTTTGACTAGTTTGGGAT   | GCgaattc GGAGTTTCTCCTTTCTG     | 240 bp      |
|            | Right | CGaagcttCCTACAACCCAGAATTTACTGC  | CGctcgagACACTCTGTATTTAATTT     | 240 bp      |
| 200 bp     | Left  | GCgcgccgcAAAGCCACTAATGACAAGGAGC | GCgaattc GGAGTTTCTCCTTTCTG     | 192 bp      |
|            | Right | CGaagcttCCTACAACCCAGAATTTACTGC  | CGctcgagTTCAGGCTGCTTGTTAAAAT   | 200 bp      |
| 160 bp     | Left  | GCgcgccgcTTCTGCATCACTCAACTGTC   | GCgaattc GGAGTTTCTCCTTTCTG     | 160 bp      |
|            | Right | CGaagcttCCTACAACCCAGAATTTACTGC  | CGctcgagTCATTCTTCTCATTTCATG    | 160bp       |
| 76 bp      | Left  | GCgcgccgcGAGAAGACTAATCCAAACCC   | GCgaattc GGAGTTTCTCCTTTCTG     | 76 bp       |
|            | Right | CGaagcttCCTACAACCCAGAATTTACTGC  | CGctcgagTATCCAGCCATACTTGTCTG   | 76 bp       |
| Primer A&B |       | TCGTGCTTTACGGTATCGCCGCTCCCGATT  | AAGACTCCCACTTTAAAGGGTGGTGTGTAG | 1.9 kb      |

**Supplementary table 2. Primer sets used for screening and genotyping KO pigs**

| Primers | Sequences (5'-3')               |
|---------|---------------------------------|
| Neo 3-1 | TCGTGCTTTACGGTATCGCCGCTCCCGATT  |
| ScS5    | CCCTTCCATCCCACCCGTCCTCATCCTTAC  |
| ScAS3   | AAGACTCCCACCTTTAAAGGGTGGTGTGTAG |
| CMAH-F  | TCCAAACCCTGTCATTCCAGAGGA        |
| CMAH-R  | ACTCTCTGTTTTTCAGGCTGCTTGT       |

**Supplementary table 3. Primer sets used to identify no integration of ZFN constructs in the genome of KO pigs.**

| Primers | Sequences (5'-3')         |
|---------|---------------------------|
| FokIF1  | CGGACGGAGCAATTTATACT      |
| FokIR1  | CCACCATTCATTAGGGTTGA      |
| HPRTF1  | GACTAGCATTCCCTACTGCTTGCTG |
| HPRTR1  | CCATGCTACTCAGGACAAGTTGAC  |

**Supplementary table 4. Primer sets used to identify off-targeting.**

| OFF-TARGET GENE LOCI: CMAH ZFN MUTAGENESIS |              |                |                |         |
|--------------------------------------------|--------------|----------------|----------------|---------|
| Gene                                       | Abbreviation | Forward primer | Reverse primer | Product |

|                                                                    |        |                      |                      |        |
|--------------------------------------------------------------------|--------|----------------------|----------------------|--------|
| ArfGAP with GTPase domain, ankyrin repeat and PH domain 1          | AGAP1  | AGCTTGTGGATTTGCGTCTT | CCCCTTCCCTTTGCTTATTG | 763 bp |
| Transient receptor potential cation channel, subfamily M, member 7 | TRPM7  | TCAGTTTTCCAGAGGCTGGT | CTTTTGCAACTTGGCTGAGA | 211 bp |
| Nonhomologous end-joining factor 1                                 | NHEJ1  | GGAATAGCCAAGTGGGATGA | TCACAGTGGGATCACCTTCA | 574 bp |
| Tousled-like kinase 2                                              | TLK2   | GGCTGCTCTGAGTGAGGAAA | CTGCGTCTGACTGGAATGAA | 430 bp |
| Tropomodulin 2                                                     | TMOD2  | TCAACCTGCAGTGTCTCTGG | GCACAAGGCTCCAAGTTCTC | 220 bp |
| Estrogen receptor 1                                                | ESR1   | GGGTCCAAATCAAGTGAGGA | ATGAAGCCAGGCAAGAAAAA | 239 bp |
| A kinase (PRKA) anchor protein 13                                  | AKAP13 | ACGTGACCTTTGCTGTGTTG | TCAGATCCTCCTTGCCAAAC | 334 bp |
| NME/NM23 nucleoside diphosphate kinase 2 (NME2)                    | NME2   | ATGCTGCTGATCTCGTTGTG | TAGTGCCTCCTCCCTAGCA  | 351 bp |

**Supplementary table 5. Primer sets used for detection of sialyltransferases mRNA expression**

| Antigen                  | Gene              | Forward primer        | Reverse primer         | Product |
|--------------------------|-------------------|-----------------------|------------------------|---------|
| <b>H-D antigen</b>       | <b>ST3Gal1</b>    | GCATCCTCTCCGTGATCTTC  | CAAGATGGTTGTCACGTTGG   | 176     |
|                          | <b>ST3Gal2</b>    | AACCACCCACCATTTTCATGT | ACTTCACTGGGGCATAGGTG   | 152     |
|                          | <b>ST3Gal3</b>    | GCTTCAAGTGGCAGGACTTC  | ATGAGGCCATTGTTGAAAGG   | 193     |
|                          | <b>ST3Gal4</b>    | GCCATCACCAGCTATTCCAT  | GTGGGCAGATTCAGGGTAGA   | 219     |
|                          | <b>ST6Gal1</b>    | TGTGTGACCAGGTGGATGTT  | TCCAAGCAGGTAGATGTCC    | 183     |
|                          | <b>ST6Gal2</b>    | ACCTGCCATGAAACCACACT  | GGTCTCCAGGAAGGAGAAGG   | 151     |
| <b>Sialyl-Tn antigen</b> | <b>ST6GalNac2</b> | GGCTGGTTCACCATGATTCT  | AACACGGCCTTCTCAGTGAT   | 209     |
|                          | <b>ST6GalNac3</b> | CTTCGAACTCACTATGGATAC | GAGCCAGACTGGACTCTGTCTT | 467     |
|                          | <b>ST6GalNac6</b> | ATGAGTAGCAACAAAGAGCAG | CCTGGGGCTTCTGCATCTTG   | 478     |
| <b>Tn antigen</b>        | <b>GALNT1</b>     | CTTTCACCTCGCTGTGAACCA | CTCTTCATTACGCCAGCACA   | 227     |
|                          | <b>GALNT2</b>     | CAGCCTCCCAGTCTGACTTC  | AGCTGGGGGACTGTTTCTT    | 179     |
|                          | <b>GALNT3</b>     | TTGGCCTTTGTGTAACACAG  | TGCTTCAAGTCAAGTGGATTTC | 239     |
|                          | <b>GALNT4</b>     | ATTCCAGTGGCATTCTGTCC  | GACAGCTCGAGGTTCTCACC   | 177     |
|                          | <b>GALNT7</b>     | TCAGGGTCTGAAAGGCAGTT  | TGTGGCAGTGCTTCAAAAAG   | 152     |

**Supplementary Figure legend**

**Supplementary Figure 1.** (a) Genotyping of monoallelic and biallelic CMAH KO mutants. The red arrow indicates mutation region compared with wild type. (b) The target sequence of CMAH-ZFN and mutation region by non-homologous end joining in the pig CMAH locus.

The red arrow indicates an 1 bp insertion in monoallelic CMAH KO mutant. (c) The target sequence of CMAH-ZFN and mutation region by homologous recombination in the pig CMAH locus. The red arrow and under line indicate a donor DNA insertion site and a partial neo sequence in biallelic CMAH KO mutant.

**Supplementary Figure 2.** Chromatogram analysis of N-glycolylneuraminic acid (Neu5Gc) in wild type, monoallelic, and biallelic CMAH KO pig lysates. After isolation of the glycoproteins from each lysate of wild type, monoallelic, and biallelic CMAH KO pig, free Neu5Gc was liberated by weak acid treatment of glycoproteins. The Chromatographic peak of Neu5Ac and Neu5Gc from each sample was measured by using a calibration curve obtained for the DMB derivative of standard Neu5Ac and Neu5Gc: (a) Standard Neu5Gc, (b) Standard Neu5Ac, (c) Control pig-derived lysate, (d) Monoallelic CMAH KO pig-derived lysate, (e) Biallelic CMAH KO pig-derived lysate. Long red arrows indicate a peak of Neu5Gc and Neu5Ac, respectively. Short blue arrows indicate O-acetylated Neu5Gc and O-acetylated Neu5Ac, respectively.

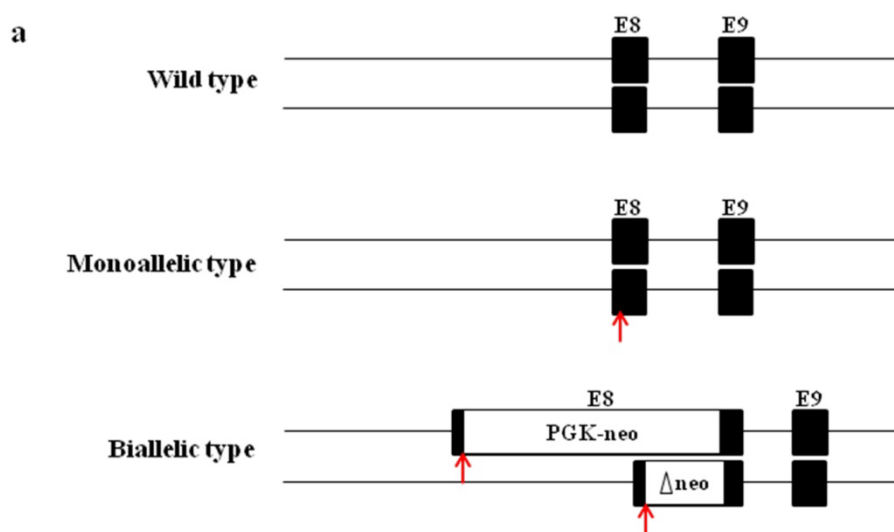

b

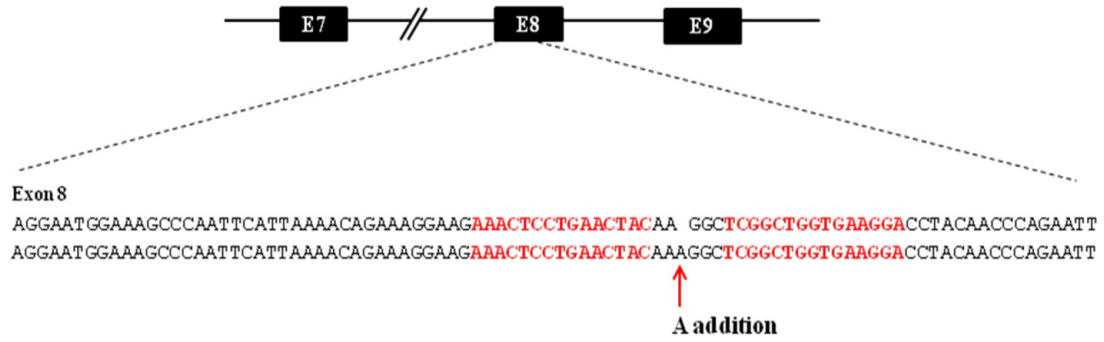

c

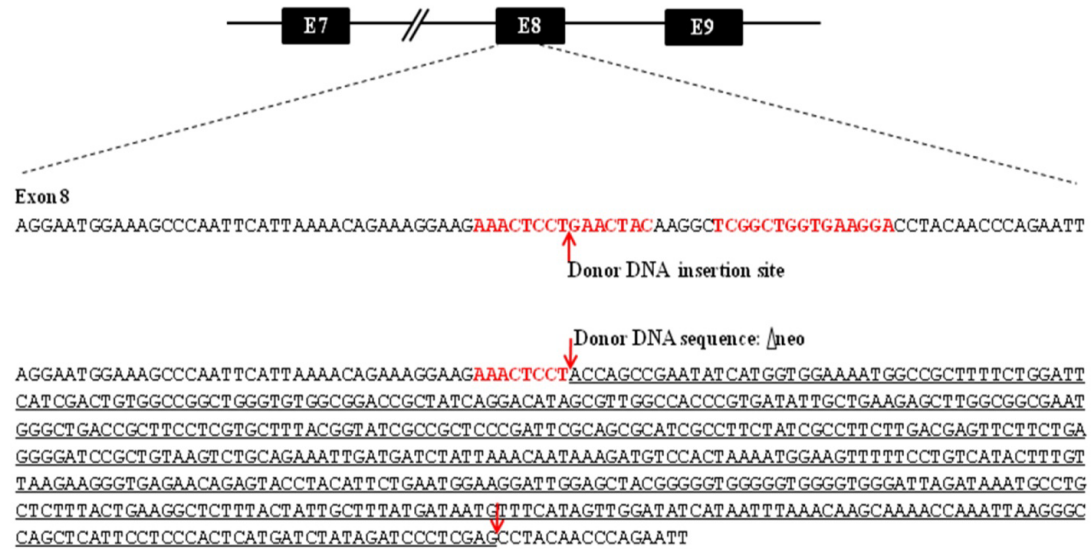

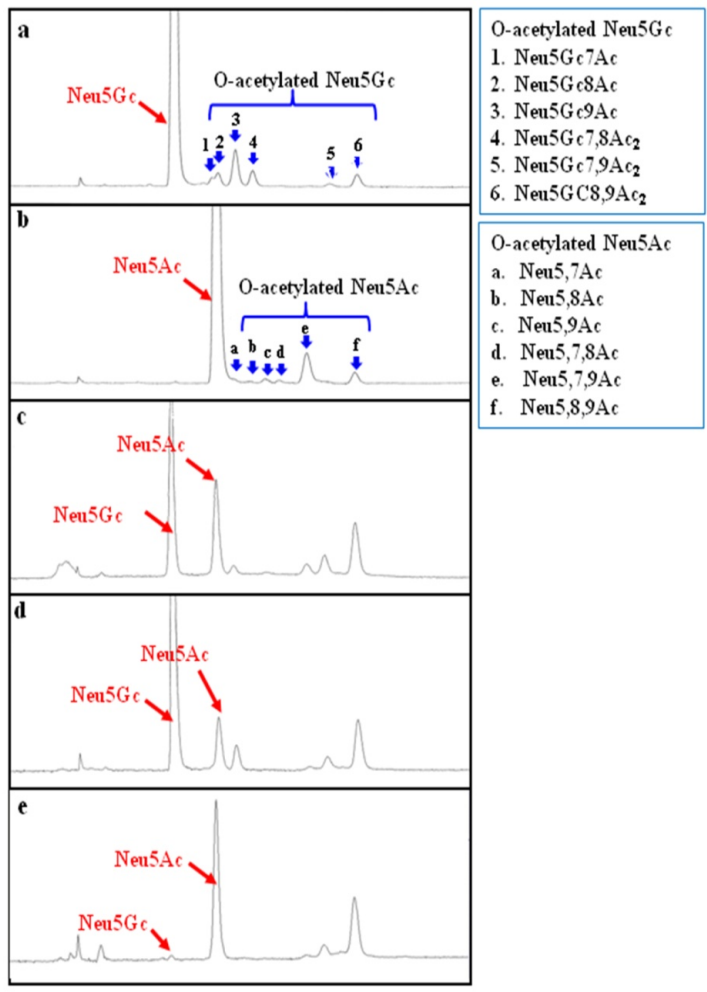

Supplement: srep01981-s1.pdf [file srep01981-s1.pdf]
